# Supplementary material
Source: publisher figshare collection journal article supplement (https://gsapubs.figshare.com/ndownloader/files/33661514)
Supplement: Supplementary file 1 [file 33661514]

## Sheet: Lithogeochemical data
Table S1. Lithogeochmical data obtained at ALS Geochmistry Laboratories for igneous rocks in central Newfoundland.
			UTM E	UTM N	Zone	Datum
SAMPLE ID	Rock type	Host unit					SiO2	Al2O3	Fe2O3	CaO	MgO	Na2O	K2O	Cr2O3	TiO2	MnO	P2O5	SrO	BaO	LOI	Total	C	S		Au		Ba	Ce	Cr	Cs	Dy	Er	Eu	Ga	Gd	Ge	Hf	Ho	La	Lu	Nb	Nd	Pr	Rb	Sm	Sn	Sr	Ta	Tb
							%	%	%	%	%	%	%	%	%	%	%	%	%	%	%	%	%		ppm		ppm	ppm	ppm	ppm	ppm	ppm	ppm	ppm	ppm	ppm	ppm	ppm	ppm	ppm	ppm	ppm	ppm	ppm	ppm	ppm	ppm	ppm	ppm
Method							ME-ICP06	ME-ICP06	ME-ICP06	ME-ICP06	ME-ICP06	ME-ICP06	ME-ICP06	ME-ICP06	ME-ICP06	ME-ICP06	ME-ICP06	ME-ICP06	ME-ICP06			C-IR07	S-IR08		Au-AA25		ME-MS81	ME-MS81	ME-MS81	ME-MS81	ME-MS81	ME-MS81	ME-MS81	ME-MS81	ME-MS81	ME-MS81	ME-MS81	ME-MS81	ME-MS81	ME-MS81	ME-MS81	ME-MS81	ME-MS81	ME-MS81	ME-MS81	ME-MS81	ME-MS81	ME-MS81	ME-MS81
Detection limit							0.01	0.01	0.01	0.01	0.01	0.01	0.01	0.002	0.01	0.01	0.01	0.01	0.01	0.01	0.01	0.01	0.01		0.01		0.5	0.1	10	0.01	0.05	0.03	0.02	0.1	0.05	5	0.1	0.01	0.1	0.01	0.1	0.1	0.02	0.2	0.03	1	0.1	0.1	0.01
BNB-18IHNL-8	monzonite	intrusion in Botwood basin (Paradise Lake monzonite)	600796	5398557	21	NAD83	70.5	13.45	5.35	2.13	0.23	4.21	3.61	0.002	0.44	0.12	0.08	0.01	0.06	0.77	100.96	0.03	0.01		0.04		573	96.2	20	5.81	14.55	9.2	2.84	27.3	14.2	<5	15.2	3.14	43.1	1.29	16.8	49	12.75	154.5	13.1	6	128	1.1	2.18
BNB-18IHNL-74b	felsic volcanic rock	within RLC corridor/WLP	518212	5367752	21	NAD83	73.8	12.35	3.41	0.94	0.23	3.49	3.68	0.003	0.36	0.08	0.16	0.01	0.08	1.9	100.49	0.33	0.01		<0.01		731	106	20	5.21	9.73	5.65	1.47	16.6	10.45	<5	7	1.91	47.8	0.72	14.2	49.6	12.8	143	10.25	5	86.4	1	1.53
BNB-18IHNL-76a	tourmaline-bearing quartz vein	RLC/WLP	518506	5368304	21	NAD83	89.1	6.42	2.73	0.09	0.07	0.27	1.52	0.006	0.23	0.06	0.07	<0.01	0.03	1.39	101.99	0.02	0.01		0.5		302	16.2	40	1.05	1.78	1.17	0.47	7.5	1.74	<5	1.8	0.41	8.3	0.17	2.9	7	1.91	54.4	1.27	1	29.7	0.1	0.28
BNB-18IHNL-77b	chloritoid-bearing mafic dyke	RLC/WLP	518293	5368419	21	NAD83	40.7	14.2	8.22	10.4	4.19	1.6	0.76	0.035	1.77	0.22	0.18	0.03	0.02	16.25	98.58	3.96	<0.01		<0.01		215	20.8	230	0.67	5.62	3.53	1.52	15.8	5.41	<5	3.4	1.25	7.9	0.46	3.4	15.3	3.26	22.6	4.87	1	268	0.1	0.93
BNB-18IHNL-78	tourmaline-bearing quartz vein	RLC/WLP	517340	5367967	21	NAD83	79.7	8.18	5.34	0.23	0.87	0.41	0.56	0.008	0.28	0.12	0.11	0.01	0.02	2.99	98.83	1	0.01		4.6		149.5	6.2	50	0.45	2.12	1.73	0.33	8.2	1.75	<5	1.5	0.59	3.6	0.2	3.1	3.6	0.87	19.7	1.09	1	63.6	0.1	0.35
BNB-18IHNL-80a	feldspar porphry	within RLC corridor/WLP	516724	5367305	21	NAD83	73	14.35	3.75	0.49	0.19	4.12	2.45	0.003	0.38	0.09	0.09	0.01	0.04	1.87	100.83	0.14	0.49		0.32		403	120	20	1.87	12	7.12	1.87	22.7	12.55	<5	11.4	2.41	57.2	0.95	20.6	54.4	14.85	108.5	12.55	5	77	1.3	1.86
BNB-18IHNL-99	altered conglomerate	RLC/WLP	518398	5368247	21	NAD83	95.1	2.2	1.26	0.05	0.02	0.11	0.5	0.005	0.09	0.02	0.04	<0.01	0.01	0.68	100.09	0.06	0.09		5.38		93.9	8.7	40	0.37	0.74	0.53	0.24	2.9	0.93	<5	0.9	0.14	4.5	0.07	1.3	4.4	1.09	16.6	1.03	<1	13.1	<0.1	0.11
BNB-18IHNL-184b2	tourmaline-bearing quartz vein	RLC/WLP	518443	5368260	21	NAD83	94.6	2.68	1.36	0.04	0.23	0.13	0.29	0.009	0.04	0.02	0.03	<0.01	0.01	0.66	100.1	0.07	0.01		2.75		59.1	109	60	0.24	3.83	1.17	2.19	3.3	7.11	<5	0.4	0.54	59.6	0.09	0.5	49.5	12.45	9.4	9.89	<1	22.6	<0.1	0.79
BNB-18IHNL-185a	quartz vein	RLC/WLP	518456	5368263	21	NAD83	95.6	2	1.21	0.03	0.11	0.09	0.32	0.009	0.06	0.04	0.04	<0.01	0.01	0.63	100.15	0.03	0.02		1.21		65.4	37.5	50	0.27	1.53	0.77	0.55	2.3	2.3	<5	0.4	0.28	20.4	0.08	0.8	15.7	4.34	10.8	2.98	<1	14	<0.1	0.25
BNB-18IHNL-185b	quartz vein	RLC/WLP	518456	5368263	21	NAD83	90.3	1.5	5.38	0.02	0.04	0.07	0.34	0.007	0.07	0.02	0.04	<0.01	0.01	1.12	98.92	0.03	0.03		18.1		64.9	1.3	50	0.23	0.52	0.35	0.07	1.7	0.42	<5	0.6	0.12	1	0.07	0.5	1	0.23	11.2	0.29	<1	7.3	0.1	0.09
BNB-18IHNL-186	altered conglomerate	RLC/WLP	518437	5368266	21	NAD83	89.4	5.66	2.32	0.06	0.05	0.23	1.33	0.008	0.24	0.06	0.06	<0.01	0.03	1.62	101.07	0.26	0.01		0.76		234	14.9	50	0.8	1.29	0.93	0.35	6.4	1.44	<5	1.6	0.26	8	0.13	2.8	6.7	1.6	42.1	1.76	1	25.9	0.2	0.21
BNB-18IHNL-195	felsic volcanic rock	within RLC corridor/WLP	518401	5368242	21	NAD83	72.1	14.15	4.37	0.23	0.31	2.62	4.11	0.002	0.36	0.13	0.08	<0.01	0.13	1.73	100.32	0.06	0.03		0.01		1125	141	10	1.74	12.65	7.22	2.45	27.8	13.05	<5	15.5	2.61	64.2	1.03	23.2	63.9	15.7	136.5	13.45	7	42.3	1.5	2.13
BNB-18IHNL-200a	quartz vein	RLC/WLP	518408	5368251	21	NAD83	99.1	0.15	0.08	0.01	0.01	0.02	0.02	0.007	<0.01	<0.01	<0.01	<0.01	<0.01	0.14	99.54	0.02	<0.01		0.44		6.9	0.6	50	0.05	0.08	<0.03	<0.02	0.2	0.12	<5	0.1	<0.01	0.5	<0.01	<0.1	0.3	0.07	0.9	0.08	<1	1.1	<0.1	0.01
BNB-18IHNL-200b	chalcopyrite-bearing, vuggy quartz vein	RLC/WLP	518408	5368251	21	NAD83	77.7	3.09	8.96	0.06	0.04	0.11	0.75	0.009	0.07	0.01	0.03	<0.01	0.02	3.77	94.62	0.27	2.27		2.33		141.5	6.7	40	0.58	0.61	0.48	0.22	3.6	0.87	<5	0.5	0.1	3.9	0.03	1	3.3	0.74	24.7	0.87	1	14.4	0.1	0.13
BNB-18IHNL-202b	altered felsic volcanic rock clast	RLC/WLP	518396	5368243	21	NAD83	81.5	10.5	1.61	0.11	0.06	0.52	2.42	0.003	0.3	0.05	0.09	0.01	0.06	1.77	99	0.02	<0.01		0.41		511	43.9	20	1.76	2.62	1.39	0.7	10.5	3.05	<5	4.4	0.54	23.3	0.29	6	18.2	5.05	72.4	3.27	1	51.9	0.5	0.5
BNB-18IHNL-215	altered conglomerate	RLC/WLP	517343	5367965	21	NAD83	76.2	10.6	5.47	0.16	0.29	0.37	2.35	0.007	0.42	0.23	0.13	0.01	0.06	2.64	98.94	0.13	0.54		0.03		516	41.3	50	1.25	3.69	2.35	0.83	10.8	3.92	<5	3.5	0.85	21	0.38	5.9	18.2	4.53	69.6	4.05	1	54.2	0.4	0.65
BNB-18IHNL-223	altered conglomerate	RLC/WLP	518350	5368226	21	NAD83	85.9	8.2	2.43	0.04	0.07	0.32	1.97	0.007	0.26	0.07	0.07	<0.01	0.04	1.66	101.04	0.03	0.03		0.05		348	30.7	40	1.34	2.27	1.39	0.59	9.6	2.18	<5	2.4	0.49	14.3	0.21	3.5	12.2	3.27	61.1	2.57	1	29.8	0.4	0.36
BNB-18IHNL-294	deformed monzogranite	Peter Strides granite	518837	5362019	21	NAD83	72.4	13.05	4.72	0.62	0.79	3.37	4.65	<0.002	0.45	0.04	0.08	<0.01	0.06	0.72	100.95	0.05	0.01		<0.01		498	89.5	10	2.45	10.55	6.05	2.07	19.7	9.66	<5	10.9	2.14	40.6	0.91	17.6	44.1	10.55	160.5	10.05	4	34.7	1.1	1.75
BNB-18IHNL-295	undeformed monzogranite	intrusion, RLC corridor (Wilding Lake pluton)	519328	5363230	21	NAD83	69.4	14.2	4.27	1.16	0.6	3.49	4.67	0.003	0.48	0.1	0.12	0.01	0.06	0.81	99.37	0.03	<0.01		<0.01		544	108	10	6.96	12.3	6.91	1.68	25.2	11.75	<5	11.6	2.39	58.2	0.95	17.7	54.6	14.25	207	12.4	7	78.9	1.3	2.01
BNB-18IHNL-304	altered volcanic rock	Red Cross Group	529910	5375366	21	NAD83	50.7	14.9	13.1	9.06	4.71	3.59	0.79	0.014	1.68	0.21	0.21	0.02	0.01	1.94	100.93	0.07	0.01		<0.01		112	17.7	90	0.66	6.22	4.02	1.64	21.4	5.6	<5	3.3	1.35	6.7	0.56	1.7	13.7	2.58	16.9	4.01	1	192.5	0.2	1.09
BNB-18IHNL-317	monzonite	intrusion in Botwood basin	570646	5392646	21	NAD83	53.5	13.6	10.25	4.51	1.26	3.87	2.07	0.002	1.25	0.28	0.45	0.02	0.04	8.7	99.8	2.47	0.02		0.01		316	75.8	10	2.45	11.1	6.8	2.77	23.7	11.45	<5	10.3	2.38	31.1	0.92	14.7	41.6	9.11	65.7	10.7	3	143.5	1	1.97
BNB-18IHNL-318	felsic volcanic rock	Stony Lake volcanic rocks	578935	5400105	21	NAD83	75.5	12.55	2.53	0.17	0.13	1.94	4.75	0.002	0.23	0.03	0.05	<0.01	0.09	1.64	99.61	0.1	0.17		0.01		699	111	10	7.35	9.02	5.05	1.3	18.2	9.25	<5	8.4	1.85	51.2	0.68	15.5	48.5	12.6	165.5	11.45	6	23	1.1	1.58
MS-19-62b	altered mafic dyke in drill core/23 m depth	Botwood basin (Moosehead showing)	614068	5428472	21	NAD83	42.1	12.3	11.45	8.8	4.86	2.34	0.39	0.011	2.07	0.18	0.22	0.03	0.02	13.75	98.52	3.4	0.12		0.01		141.5	22.8	80	3.02	6.52	3.75	1.73	18.3	6.11	<5	4.5	1.36	8.5	0.53	4.2	16.2	3.19	14.4	4.78	1	220	0.3	1.06
WL-17-29a	tonalite in drill core/292 m depth	Crippleback Intrusive Suite/WLP	517453	5367934	21	NAD83	52.6	14.4	7.42	5.46	3.29	3.43	2.19	0.006	0.53	0.14	0.24	0.05	0.08	9.56	99.4	2.24	0.01		0.02		677	64.3	40	1.78	3.38	1.91	1.34	14	4.4	<5	3	0.64	32.7	0.3	4.1	26.1	7.21	84.1	5.27	1	396	0.3	0.55
WL-17-29b	altered conglomerate in drill core/289 m depth	RLC/WLP	517453	5367934	21	NAD83	45.1	14.55	7.5	8.89	3.28	0.28	4.26	0.007	0.53	0.16	0.21	0.04	0.1	13.5	98.41	3.68	0.18		0.4		838	64	50	2.72	3.52	1.93	1.3	15.5	4.77	<5	4.5	0.61	32.6	0.3	3.9	27.2	7.01	146	5.41	1	338	0.2	0.65
BNB-18-052A	quartz vein with chalcopyrite	RLC/WLP	518439	5368250	21	NAD83	10.8	0.23	37.5	0.09	0.06	0.01	0.03	<0.002	0.01	<0.01	<0.01	<0.01	<0.01	12.75	61.48	0.13	25.3		2.52		6.9	0.5	10	0.03	0.11	0.05	0.03	0.5	0.21	<5	<0.1	0.03	1	0.01	<0.1	0.9	0.25	0.8	0.21	3	2.8	<0.1	0.02
BNB-18-053A1	quartz vein	RLC/WLP	517337	5367961	21	NAD83	98.8	0.77	0.67	0.05	0.1	0.05	0.06	0.003	0.04	0.01	<0.01	<0.01	<0.01	0.45	101	0.16	0.05		8.66		14.5	1.3	20	0.07	0.26	0.09	0.02	0.9	0.13	<5	0.3	0.05	0.7	0.02	0.5	0.6	0.12	2	0.14	<1	6.6	0.1	0.03
BNB-18-053A2	quartz vein	RLC/WLP	517337	5367961	21	NAD83	96.7	0.63	0.45	0.03	0.09	0.03	<0.01	0.005	0.02	<0.01	<0.01	<0.01	<0.01	0.27	98.23	0.09	0.03		2.06		3	1.1	30	0.02	0.1	<0.03	0.04	0.7	0.16	<5	0.2	0.02	1	0.01	0.1	0.6	0.17	0.3	0.17	<1	5	<0.1	0.02
BNB-18-053B1	quartz vein	RLC/WLP	517337	5367961	21	NAD83	91.2	3.96	2.12	0.09	0.5	0.21	0.13	0.007	0.11	0.02	0.09	0.01	<0.01	0.94	99.39	0.24	0.02		0.14		24.5	1445	50	0.19	17.55	3.02	18.95	9.3	55.4	<5	1.1	1.78	709	0.22	1.4	536	142	4.8	98.3	<1	33.1	0.2	5.75
BNB-18-053B2	altered conglomerate	RLC/WLP	517337	5367961	21	NAD83	57.2	17	10.55	0.25	2.12	0.86	0.68	0.01	0.65	0.07	0.11	0.01	0.02	3.85	93.38	1.04	0.05		1.47		139.5	27.1	80	0.48	5.79	3.93	0.78	16.9	3.95	<5	5.5	1.27	14.7	0.5	9.3	11.9	3.13	23.5	3	1	133.5	0.7	0.79
BNB-18-053B3	altered conglomerate	RLC/WLP	517337	5367961	21	NAD83	68.7	14.1	8.96	0.2	1.55	0.69	0.91	0.01	0.57	0.08	0.12	0.01	0.02	3.51	99.43	0.95	0.02		1.47		181	19.9	70	0.66	5.2	3.87	0.6	13.8	3.19	<5	4.9	1.19	10.9	0.51	8	8.9	2.31	29.6	2.1	1	102	0.6	0.7
BNB-18-054	quartz-ankerite vein	RLC/WLP	517342	5367966	21	NAD83	81.6	1.53	1.02	8.3	0.18	0.12	0.28	0.006	0.08	0.06	0.04	0.02	0.02	7.22	100.48	1.93	0.03		0.01		165	13	40	0.54	2.11	1.06	0.87	2.1	2.61	<5	1	0.38	5.6	0.12	1.3	8.7	1.77	8.8	2.85	<1	138	0.1	0.37
Notes:
RLC is Rogerson Lake Conglomerate
WLP is Wilding Lake gold prospect
[truncated: 27 more columns]
